# Supplementary material for: The Therapeutic Effect of Ginsenoside Rb1 against Mechanical Trauma in a Rat Model of Postpartum Stress Urinary Incontinence
Source: Hindawi journal article supplement (doi:10.1155/2024/8495774), 2024-01-01
Supplement: f1 [file 8495774.f1.docx]

Supplementary Table1

Primer sequence

| Gene name | Gene ID | Primer sequence（5’-3’） | Amplicon size (bp) |
| --- | --- | --- | --- |
| TGF-β1 | NM_021578.2 | F: ATGGTGGACCGCAACAACGC | 100 |
| R: CTGGCACTGCTTCCCGAATGTC |
| smad3 | NM_013095.3 | F: TCGTCCATCCTGCCCTTCACC | 85 |
|  | R: ACTTCTCCTCCTGCCCGTTCTG |
| smad7 | NM_030858.2 | F: TGTCCAGACGCTGTACCTTCCTC | 117 |
|  | R: CACGCACCAGTGTGACCGATC |
| Collagen I | NM_053304.1 | F: TGTGCGATGGCGTGCTATGC | 107 |
| R: TGCGTCTGGTGATACATATTCTTCTGG |
| Collagen III | NM_032085.1 | F: GACACGCTGGTGCTCAAGGAC | 177 |
| R: GTTCGCCTGAAGGACCTCGTTG |
| GADGH | NM_017008.4 | F: CCACTCACGGCAAATTCAAC | 140 |
| R: CTCCACGACATACTCAGCAC |  |
